# Supplementary material for: Ursolic Acid Attenuates Hepatic Steatosis, Fibrosis, and Insulin Resistance by Modulating the Circadian Rhythm Pathway in Diet-Induced Obese Mice
Source: PubMed Central journal article supplement (PMC6266464; doi:10.3390/nu10111719), 2018-11-09
Supplement: nutrients-10-01719-s001.pdf [file nutrients-10-01719-s001.pdf]

# Ursolic acid attenuates hepatic steatosis, fibrosis, and insulin resistance by modulating the circadian rhythm pathway in diet-induced obese mice

Su-Kyung Shin <sup>1,†</sup>, Eun-Young Kwon <sup>2,3,†</sup> and Myung-Sook Choi <sup>2,3,\*</sup>

## 1. Materials and Methods

**Table S1.** Primer sequences used for RT-qPCR validation of the microarray data.

| Gene                                                    | Primer direction | Primer sequence                   |
|---------------------------------------------------------|------------------|-----------------------------------|
| Glyceraldehyde 3-phosphate dehydrogenase (Gapdh)        | Forward          | 5'-AGGTCGGTGTGAACGGATTTG-3'       |
|                                                         | Reverse          | 5'-TGTAGACCATGTAGTTGAGGTCA-3'     |
| Complement factor D (adipsin) (Cfd)                     | Forward          | 5'-GCCGACCTGACAGCCTTGAG-3'        |
|                                                         | Reverse          | 5'-TTCCACTTCTTTGTCTCGTATTGC-3'    |
| 3-hydroxy-3-methylglutaryl coenzyme A reductase (Hmgcr) | Forward          | 5'-TTCACGCTCATAGTCGCTGGATAG-3'    |
|                                                         | Reverse          | 5'-TGGTTCAATTCTCTTGGACACATCTTC-3' |
| Acetyl Coenzyme A Acetyltransferase 1 (Acat1)           | Forward          | 5'-CTCACGGCAGGAACAGGATACG-3'      |
|                                                         | Reverse          | 5'-TTCTTCATCTTCTTTCACCACCACATC-3' |
| Cell death-inducing DFFA-like effector A (Cidea)        | Forward          | 5'-TTTCAAACCATGACCGAAGTAGC-3'     |
|                                                         | Reverse          | 5'-CCTCCAGCACCAGCGTAACC-3'        |
| Lipoprotein lipase (Lpl)                                | Forward          | 5'-CAAGTTCAACGGCACAGTCAAGG-3'     |
|                                                         | Reverse          | 5'-ACATACTCAGCACCAGCATCACC-3'     |

## 2. Results

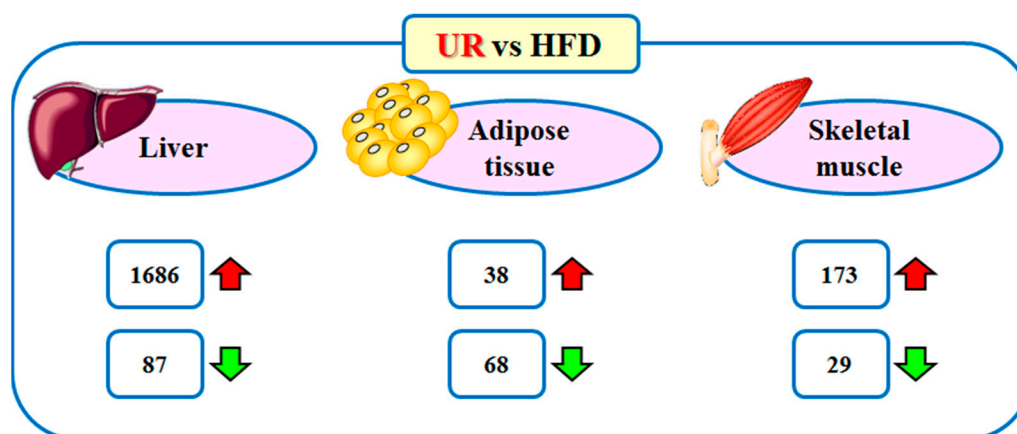

**Figure S1.** The number of differentially expressed genes (DEGs) in the liver, adipose tissue and skeletal muscle of C57BL/6J mice. Differentially expressed genes based on comparison of HFD vs. ND and UR vs. HFD according to p-value < 0.05, log<sub>2</sub> fold change > 0.5.

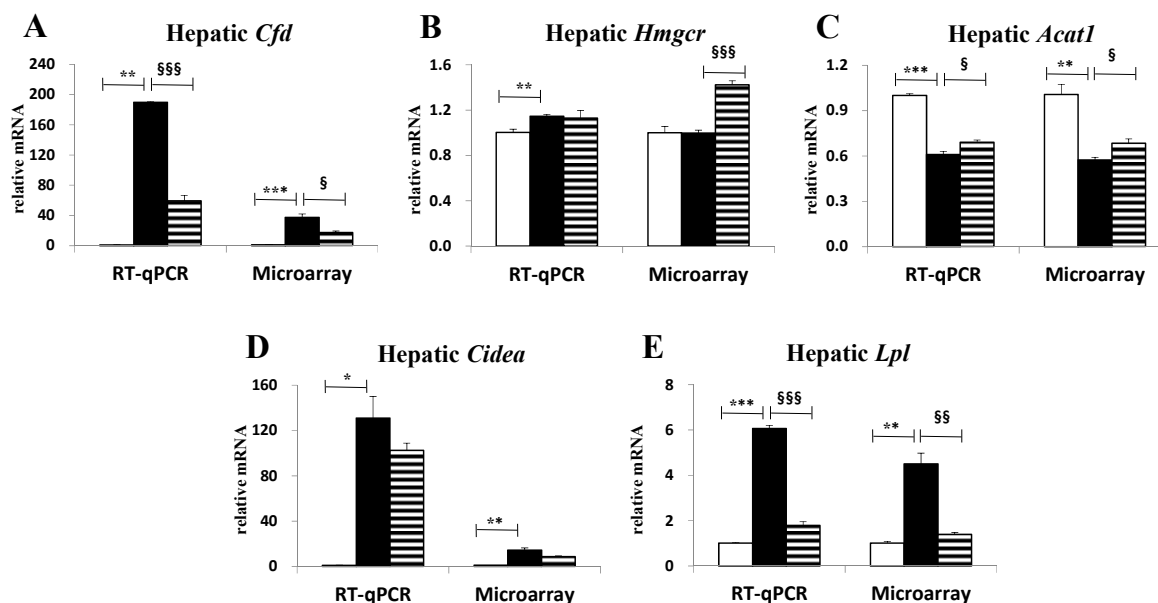

**Figure S2.** Real-time RT-qPCR validation. Microarray and RT-qPCR data shown as means ± S.E. ND vs HFD; \*p<0.05, \*\*p<0.01, \*\*\*p<0.001. HFD vs UR; §p<0.05, §§p<0.01, §§§p<0.001. White bar = ND group; black bar = HFD group; stripe bar = UR group.

**Table S2.** Effect of ursolic acid on transcriptional pattern of lipid metabolism-related genes in liver of C57BL/6J mice.

| Gene                              | Fold change (HFD/ND) | p value | Fold change (UR/HFD) | p value | Heatmap                                                                                                                                                                                                                                                                                                                                                                                                                                                                                                                                                                                                                                                                         |   |   |   |   |   |   |   |   |   |   |   |   |   |   |   |       |   |   |   |        |   |   |   |        |   |   |   |        |   |   |   |        |   |   |   |        |   |   |   |        |   |   |   |      |
|-----------------------------------|----------------------|---------|----------------------|---------|---------------------------------------------------------------------------------------------------------------------------------------------------------------------------------------------------------------------------------------------------------------------------------------------------------------------------------------------------------------------------------------------------------------------------------------------------------------------------------------------------------------------------------------------------------------------------------------------------------------------------------------------------------------------------------|---|---|---|---|---|---|---|---|---|---|---|---|---|---|---|-------|---|---|---|--------|---|---|---|--------|---|---|---|--------|---|---|---|--------|---|---|---|--------|---|---|---|--------|---|---|---|------|
| <b>FA and lipid transporter</b>   |                      |         |                      |         |                                                                                                                                                                                                                                                                                                                                                                                                                                                                                                                                                                                                                                                                                 |   |   |   |   |   |   |   |   |   |   |   |   |   |   |   |       |   |   |   |        |   |   |   |        |   |   |   |        |   |   |   |        |   |   |   |        |   |   |   |        |   |   |   |      |
| Ffar3                             | 1.25                 | 0.01565 | -1.68                | 0.00000 | <table border="0"> <tr><td>H</td><td>F</td><td>U</td></tr> <tr><td>N</td><td>F</td><td>U</td></tr> <tr><td>D</td><td>D</td><td>R</td></tr> <tr><td>D</td><td>D</td><td>R</td></tr> </table><br><table border="0"> <tr><td>■</td><td>■</td><td>■</td><td>Ffar3</td></tr> <tr><td>■</td><td>■</td><td>■</td><td>Lpl</td></tr> <tr><td>■</td><td>■</td><td>■</td><td>Stab2</td></tr> <tr><td>■</td><td>■</td><td>■</td><td>Pcsk9</td></tr> </table>                                                                                                                                                                                                                                | H | F | U | N | F | U | D | D | R | D | D | R | ■ | ■ | ■ | Ffar3 | ■ | ■ | ■ | Lpl    | ■ | ■ | ■ | Stab2  | ■ | ■ | ■ | Pcsk9  |   |   |   |        |   |   |   |        |   |   |   |        |   |   |   |      |
| H                                 | F                    | U       |                      |         |                                                                                                                                                                                                                                                                                                                                                                                                                                                                                                                                                                                                                                                                                 |   |   |   |   |   |   |   |   |   |   |   |   |   |   |   |       |   |   |   |        |   |   |   |        |   |   |   |        |   |   |   |        |   |   |   |        |   |   |   |        |   |   |   |      |
| N                                 | F                    | U       |                      |         |                                                                                                                                                                                                                                                                                                                                                                                                                                                                                                                                                                                                                                                                                 |   |   |   |   |   |   |   |   |   |   |   |   |   |   |   |       |   |   |   |        |   |   |   |        |   |   |   |        |   |   |   |        |   |   |   |        |   |   |   |        |   |   |   |      |
| D                                 | D                    | R       |                      |         |                                                                                                                                                                                                                                                                                                                                                                                                                                                                                                                                                                                                                                                                                 |   |   |   |   |   |   |   |   |   |   |   |   |   |   |   |       |   |   |   |        |   |   |   |        |   |   |   |        |   |   |   |        |   |   |   |        |   |   |   |        |   |   |   |      |
| D                                 | D                    | R       |                      |         |                                                                                                                                                                                                                                                                                                                                                                                                                                                                                                                                                                                                                                                                                 |   |   |   |   |   |   |   |   |   |   |   |   |   |   |   |       |   |   |   |        |   |   |   |        |   |   |   |        |   |   |   |        |   |   |   |        |   |   |   |        |   |   |   |      |
| ■                                 | ■                    | ■       | Ffar3                |         |                                                                                                                                                                                                                                                                                                                                                                                                                                                                                                                                                                                                                                                                                 |   |   |   |   |   |   |   |   |   |   |   |   |   |   |   |       |   |   |   |        |   |   |   |        |   |   |   |        |   |   |   |        |   |   |   |        |   |   |   |        |   |   |   |      |
| ■                                 | ■                    | ■       | Lpl                  |         |                                                                                                                                                                                                                                                                                                                                                                                                                                                                                                                                                                                                                                                                                 |   |   |   |   |   |   |   |   |   |   |   |   |   |   |   |       |   |   |   |        |   |   |   |        |   |   |   |        |   |   |   |        |   |   |   |        |   |   |   |        |   |   |   |      |
| ■                                 | ■                    | ■       | Stab2                |         |                                                                                                                                                                                                                                                                                                                                                                                                                                                                                                                                                                                                                                                                                 |   |   |   |   |   |   |   |   |   |   |   |   |   |   |   |       |   |   |   |        |   |   |   |        |   |   |   |        |   |   |   |        |   |   |   |        |   |   |   |        |   |   |   |      |
| ■                                 | ■                    | ■       | Pcsk9                |         |                                                                                                                                                                                                                                                                                                                                                                                                                                                                                                                                                                                                                                                                                 |   |   |   |   |   |   |   |   |   |   |   |   |   |   |   |       |   |   |   |        |   |   |   |        |   |   |   |        |   |   |   |        |   |   |   |        |   |   |   |        |   |   |   |      |
| Lpl                               | 4.44                 | 0.00000 | -3.20                | 0.00000 |                                                                                                                                                                                                                                                                                                                                                                                                                                                                                                                                                                                                                                                                                 |   |   |   |   |   |   |   |   |   |   |   |   |   |   |   |       |   |   |   |        |   |   |   |        |   |   |   |        |   |   |   |        |   |   |   |        |   |   |   |        |   |   |   |      |
| Stab2                             | 1.39                 | 0.00003 | -1.44                | 0.00001 |                                                                                                                                                                                                                                                                                                                                                                                                                                                                                                                                                                                                                                                                                 |   |   |   |   |   |   |   |   |   |   |   |   |   |   |   |       |   |   |   |        |   |   |   |        |   |   |   |        |   |   |   |        |   |   |   |        |   |   |   |        |   |   |   |      |
| Pcsk9                             | -2.97                | 0.00047 | 1.41                 | 0.00000 |                                                                                                                                                                                                                                                                                                                                                                                                                                                                                                                                                                                                                                                                                 |   |   |   |   |   |   |   |   |   |   |   |   |   |   |   |       |   |   |   |        |   |   |   |        |   |   |   |        |   |   |   |        |   |   |   |        |   |   |   |        |   |   |   |      |
| <b>FA synthesis</b>               |                      |         |                      |         |                                                                                                                                                                                                                                                                                                                                                                                                                                                                                                                                                                                                                                                                                 |   |   |   |   |   |   |   |   |   |   |   |   |   |   |   |       |   |   |   |        |   |   |   |        |   |   |   |        |   |   |   |        |   |   |   |        |   |   |   |        |   |   |   |      |
| Acaa2                             | -1.26                | 0.01237 | 1.73                 | 0.00000 | <table border="0"> <tr><td>H</td><td>F</td><td>U</td></tr> <tr><td>N</td><td>F</td><td>U</td></tr> <tr><td>D</td><td>D</td><td>R</td></tr> <tr><td>D</td><td>D</td><td>R</td></tr> </table><br><table border="0"> <tr><td>■</td><td>■</td><td>■</td><td>Acaa2</td></tr> <tr><td>■</td><td>■</td><td>■</td><td>Cidea</td></tr> <tr><td>■</td><td>■</td><td>■</td><td>Decr2</td></tr> <tr><td>■</td><td>■</td><td>■</td><td>Fads2</td></tr> </table>                                                                                                                                                                                                                              | H | F | U | N | F | U | D | D | R | D | D | R | ■ | ■ | ■ | Acaa2 | ■ | ■ | ■ | Cidea  | ■ | ■ | ■ | Decr2  | ■ | ■ | ■ | Fads2  |   |   |   |        |   |   |   |        |   |   |   |        |   |   |   |      |
| H                                 | F                    | U       |                      |         |                                                                                                                                                                                                                                                                                                                                                                                                                                                                                                                                                                                                                                                                                 |   |   |   |   |   |   |   |   |   |   |   |   |   |   |   |       |   |   |   |        |   |   |   |        |   |   |   |        |   |   |   |        |   |   |   |        |   |   |   |        |   |   |   |      |
| N                                 | F                    | U       |                      |         |                                                                                                                                                                                                                                                                                                                                                                                                                                                                                                                                                                                                                                                                                 |   |   |   |   |   |   |   |   |   |   |   |   |   |   |   |       |   |   |   |        |   |   |   |        |   |   |   |        |   |   |   |        |   |   |   |        |   |   |   |        |   |   |   |      |
| D                                 | D                    | R       |                      |         |                                                                                                                                                                                                                                                                                                                                                                                                                                                                                                                                                                                                                                                                                 |   |   |   |   |   |   |   |   |   |   |   |   |   |   |   |       |   |   |   |        |   |   |   |        |   |   |   |        |   |   |   |        |   |   |   |        |   |   |   |        |   |   |   |      |
| D                                 | D                    | R       |                      |         |                                                                                                                                                                                                                                                                                                                                                                                                                                                                                                                                                                                                                                                                                 |   |   |   |   |   |   |   |   |   |   |   |   |   |   |   |       |   |   |   |        |   |   |   |        |   |   |   |        |   |   |   |        |   |   |   |        |   |   |   |        |   |   |   |      |
| ■                                 | ■                    | ■       | Acaa2                |         |                                                                                                                                                                                                                                                                                                                                                                                                                                                                                                                                                                                                                                                                                 |   |   |   |   |   |   |   |   |   |   |   |   |   |   |   |       |   |   |   |        |   |   |   |        |   |   |   |        |   |   |   |        |   |   |   |        |   |   |   |        |   |   |   |      |
| ■                                 | ■                    | ■       | Cidea                |         |                                                                                                                                                                                                                                                                                                                                                                                                                                                                                                                                                                                                                                                                                 |   |   |   |   |   |   |   |   |   |   |   |   |   |   |   |       |   |   |   |        |   |   |   |        |   |   |   |        |   |   |   |        |   |   |   |        |   |   |   |        |   |   |   |      |
| ■                                 | ■                    | ■       | Decr2                |         |                                                                                                                                                                                                                                                                                                                                                                                                                                                                                                                                                                                                                                                                                 |   |   |   |   |   |   |   |   |   |   |   |   |   |   |   |       |   |   |   |        |   |   |   |        |   |   |   |        |   |   |   |        |   |   |   |        |   |   |   |        |   |   |   |      |
| ■                                 | ■                    | ■       | Fads2                |         |                                                                                                                                                                                                                                                                                                                                                                                                                                                                                                                                                                                                                                                                                 |   |   |   |   |   |   |   |   |   |   |   |   |   |   |   |       |   |   |   |        |   |   |   |        |   |   |   |        |   |   |   |        |   |   |   |        |   |   |   |        |   |   |   |      |
| Cidea                             | 14.08                | 0.00000 | -1.67                | 0.04045 |                                                                                                                                                                                                                                                                                                                                                                                                                                                                                                                                                                                                                                                                                 |   |   |   |   |   |   |   |   |   |   |   |   |   |   |   |       |   |   |   |        |   |   |   |        |   |   |   |        |   |   |   |        |   |   |   |        |   |   |   |        |   |   |   |      |
| Decr2                             | -1.10                | 0.92599 | -1.63                | 0.00001 |                                                                                                                                                                                                                                                                                                                                                                                                                                                                                                                                                                                                                                                                                 |   |   |   |   |   |   |   |   |   |   |   |   |   |   |   |       |   |   |   |        |   |   |   |        |   |   |   |        |   |   |   |        |   |   |   |        |   |   |   |        |   |   |   |      |
| Fads2                             | -1.54                | 0.00011 | -1.56                | 0.00007 |                                                                                                                                                                                                                                                                                                                                                                                                                                                                                                                                                                                                                                                                                 |   |   |   |   |   |   |   |   |   |   |   |   |   |   |   |       |   |   |   |        |   |   |   |        |   |   |   |        |   |   |   |        |   |   |   |        |   |   |   |        |   |   |   |      |
| <b>Lipogenesis</b>                |                      |         |                      |         |                                                                                                                                                                                                                                                                                                                                                                                                                                                                                                                                                                                                                                                                                 |   |   |   |   |   |   |   |   |   |   |   |   |   |   |   |       |   |   |   |        |   |   |   |        |   |   |   |        |   |   |   |        |   |   |   |        |   |   |   |        |   |   |   |      |
| Acat3                             | 1.17                 | 0.29511 | -1.42                | 0.00023 | <table border="0"> <tr><td>H</td><td>F</td><td>U</td></tr> <tr><td>N</td><td>F</td><td>U</td></tr> <tr><td>D</td><td>D</td><td>R</td></tr> <tr><td>D</td><td>D</td><td>R</td></tr> </table><br><table border="0"> <tr><td>■</td><td>■</td><td>■</td><td>Acat3</td></tr> <tr><td>■</td><td>■</td><td>■</td><td>Agpat3</td></tr> <tr><td>■</td><td>■</td><td>■</td><td>Agpat9</td></tr> <tr><td>■</td><td>■</td><td>■</td><td>Elovl1</td></tr> <tr><td>■</td><td>■</td><td>■</td><td>Elovl2</td></tr> <tr><td>■</td><td>■</td><td>■</td><td>Elovl3</td></tr> <tr><td>■</td><td>■</td><td>■</td><td>Elovl5</td></tr> <tr><td>■</td><td>■</td><td>■</td><td>Ppt1</td></tr> </table> | H | F | U | N | F | U | D | D | R | D | D | R | ■ | ■ | ■ | Acat3 | ■ | ■ | ■ | Agpat3 | ■ | ■ | ■ | Agpat9 | ■ | ■ | ■ | Elovl1 | ■ | ■ | ■ | Elovl2 | ■ | ■ | ■ | Elovl3 | ■ | ■ | ■ | Elovl5 | ■ | ■ | ■ | Ppt1 |
| H                                 | F                    | U       |                      |         |                                                                                                                                                                                                                                                                                                                                                                                                                                                                                                                                                                                                                                                                                 |   |   |   |   |   |   |   |   |   |   |   |   |   |   |   |       |   |   |   |        |   |   |   |        |   |   |   |        |   |   |   |        |   |   |   |        |   |   |   |        |   |   |   |      |
| N                                 | F                    | U       |                      |         |                                                                                                                                                                                                                                                                                                                                                                                                                                                                                                                                                                                                                                                                                 |   |   |   |   |   |   |   |   |   |   |   |   |   |   |   |       |   |   |   |        |   |   |   |        |   |   |   |        |   |   |   |        |   |   |   |        |   |   |   |        |   |   |   |      |
| D                                 | D                    | R       |                      |         |                                                                                                                                                                                                                                                                                                                                                                                                                                                                                                                                                                                                                                                                                 |   |   |   |   |   |   |   |   |   |   |   |   |   |   |   |       |   |   |   |        |   |   |   |        |   |   |   |        |   |   |   |        |   |   |   |        |   |   |   |        |   |   |   |      |
| D                                 | D                    | R       |                      |         |                                                                                                                                                                                                                                                                                                                                                                                                                                                                                                                                                                                                                                                                                 |   |   |   |   |   |   |   |   |   |   |   |   |   |   |   |       |   |   |   |        |   |   |   |        |   |   |   |        |   |   |   |        |   |   |   |        |   |   |   |        |   |   |   |      |
| ■                                 | ■                    | ■       | Acat3                |         |                                                                                                                                                                                                                                                                                                                                                                                                                                                                                                                                                                                                                                                                                 |   |   |   |   |   |   |   |   |   |   |   |   |   |   |   |       |   |   |   |        |   |   |   |        |   |   |   |        |   |   |   |        |   |   |   |        |   |   |   |        |   |   |   |      |
| ■                                 | ■                    | ■       | Agpat3               |         |                                                                                                                                                                                                                                                                                                                                                                                                                                                                                                                                                                                                                                                                                 |   |   |   |   |   |   |   |   |   |   |   |   |   |   |   |       |   |   |   |        |   |   |   |        |   |   |   |        |   |   |   |        |   |   |   |        |   |   |   |        |   |   |   |      |
| ■                                 | ■                    | ■       | Agpat9               |         |                                                                                                                                                                                                                                                                                                                                                                                                                                                                                                                                                                                                                                                                                 |   |   |   |   |   |   |   |   |   |   |   |   |   |   |   |       |   |   |   |        |   |   |   |        |   |   |   |        |   |   |   |        |   |   |   |        |   |   |   |        |   |   |   |      |
| ■                                 | ■                    | ■       | Elovl1               |         |                                                                                                                                                                                                                                                                                                                                                                                                                                                                                                                                                                                                                                                                                 |   |   |   |   |   |   |   |   |   |   |   |   |   |   |   |       |   |   |   |        |   |   |   |        |   |   |   |        |   |   |   |        |   |   |   |        |   |   |   |        |   |   |   |      |
| ■                                 | ■                    | ■       | Elovl2               |         |                                                                                                                                                                                                                                                                                                                                                                                                                                                                                                                                                                                                                                                                                 |   |   |   |   |   |   |   |   |   |   |   |   |   |   |   |       |   |   |   |        |   |   |   |        |   |   |   |        |   |   |   |        |   |   |   |        |   |   |   |        |   |   |   |      |
| ■                                 | ■                    | ■       | Elovl3               |         |                                                                                                                                                                                                                                                                                                                                                                                                                                                                                                                                                                                                                                                                                 |   |   |   |   |   |   |   |   |   |   |   |   |   |   |   |       |   |   |   |        |   |   |   |        |   |   |   |        |   |   |   |        |   |   |   |        |   |   |   |        |   |   |   |      |
| ■                                 | ■                    | ■       | Elovl5               |         |                                                                                                                                                                                                                                                                                                                                                                                                                                                                                                                                                                                                                                                                                 |   |   |   |   |   |   |   |   |   |   |   |   |   |   |   |       |   |   |   |        |   |   |   |        |   |   |   |        |   |   |   |        |   |   |   |        |   |   |   |        |   |   |   |      |
| ■                                 | ■                    | ■       | Ppt1                 |         |                                                                                                                                                                                                                                                                                                                                                                                                                                                                                                                                                                                                                                                                                 |   |   |   |   |   |   |   |   |   |   |   |   |   |   |   |       |   |   |   |        |   |   |   |        |   |   |   |        |   |   |   |        |   |   |   |        |   |   |   |        |   |   |   |      |
| Agpat3                            | 1.09                 | 0.95761 | 2.85                 | 0.00000 |                                                                                                                                                                                                                                                                                                                                                                                                                                                                                                                                                                                                                                                                                 |   |   |   |   |   |   |   |   |   |   |   |   |   |   |   |       |   |   |   |        |   |   |   |        |   |   |   |        |   |   |   |        |   |   |   |        |   |   |   |        |   |   |   |      |
| Agpat9                            | 1.05                 | 0.99653 | -1.37                | 0.00029 |                                                                                                                                                                                                                                                                                                                                                                                                                                                                                                                                                                                                                                                                                 |   |   |   |   |   |   |   |   |   |   |   |   |   |   |   |       |   |   |   |        |   |   |   |        |   |   |   |        |   |   |   |        |   |   |   |        |   |   |   |        |   |   |   |      |
| Elovl1                            | 1.09                 | 0.68989 | -1.36                | 0.00005 |                                                                                                                                                                                                                                                                                                                                                                                                                                                                                                                                                                                                                                                                                 |   |   |   |   |   |   |   |   |   |   |   |   |   |   |   |       |   |   |   |        |   |   |   |        |   |   |   |        |   |   |   |        |   |   |   |        |   |   |   |        |   |   |   |      |
| Elovl2                            | -1.93                | 0.00005 | 3.69                 | 0.00000 |                                                                                                                                                                                                                                                                                                                                                                                                                                                                                                                                                                                                                                                                                 |   |   |   |   |   |   |   |   |   |   |   |   |   |   |   |       |   |   |   |        |   |   |   |        |   |   |   |        |   |   |   |        |   |   |   |        |   |   |   |        |   |   |   |      |
| Elovl3                            | -3.02                | 0.00002 | -1.67                | 0.01960 |                                                                                                                                                                                                                                                                                                                                                                                                                                                                                                                                                                                                                                                                                 |   |   |   |   |   |   |   |   |   |   |   |   |   |   |   |       |   |   |   |        |   |   |   |        |   |   |   |        |   |   |   |        |   |   |   |        |   |   |   |        |   |   |   |      |
| Elovl5                            | -1.09                | 0.93562 | -1.47                | 0.00006 |                                                                                                                                                                                                                                                                                                                                                                                                                                                                                                                                                                                                                                                                                 |   |   |   |   |   |   |   |   |   |   |   |   |   |   |   |       |   |   |   |        |   |   |   |        |   |   |   |        |   |   |   |        |   |   |   |        |   |   |   |        |   |   |   |      |
| Ppt1                              | 1.32                 | 0.00066 | -1.43                | 0.00002 |                                                                                                                                                                                                                                                                                                                                                                                                                                                                                                                                                                                                                                                                                 |   |   |   |   |   |   |   |   |   |   |   |   |   |   |   |       |   |   |   |        |   |   |   |        |   |   |   |        |   |   |   |        |   |   |   |        |   |   |   |        |   |   |   |      |
| <b>FA oxidation and Lipolysis</b> |                      |         |                      |         |                                                                                                                                                                                                                                                                                                                                                                                                                                                                                                                                                                                                                                                                                 |   |   |   |   |   |   |   |   |   |   |   |   |   |   |   |       |   |   |   |        |   |   |   |        |   |   |   |        |   |   |   |        |   |   |   |        |   |   |   |        |   |   |   |      |
| Abcd2                             | -1.00                | 1.00000 | 1.67                 | 0.00000 |                                                                                                                                                                                                                                                                                                                                                                                                                                                                                                                                                                                                                                                                                 |   |   |   |   |   |   |   |   |   |   |   |   |   |   |   |       |   |   |   |        |   |   |   |        |   |   |   |        |   |   |   |        |   |   |   |        |   |   |   |        |   |   |   |      |
| Abcd3                             | -1.05                | 1.00000 | 3.96                 | 0.00000 |                                                                                                                                                                                                                                                                                                                                                                                                                                                                                                                                                                                                                                                                                 |   |   |   |   |   |   |   |   |   |   |   |   |   |   |   |       |   |   |   |        |   |   |   |        |   |   |   |        |   |   |   |        |   |   |   |        |   |   |   |        |   |   |   |      |
| Acadsb                            | 1.17                 | 0.67896 | 4.01                 | 0.00000 |                                                                                                                                                                                                                                                                                                                                                                                                                                                                                                                                                                                                                                                                                 |   |   |   |   |   |   |   |   |   |   |   |   |   |   |   |       |   |   |   |        |   |   |   |        |   |   |   |        |   |   |   |        |   |   |   |        |   |   |   |        |   |   |   |      |
| Acot3                             | -2.96                | 0.00007 | 2.15                 | 0.00542 |                                                                                                                                                                                                                                                                                                                                                                                                                                                                                                                                                                                                                                                                                 |   |   |   |   |   |   |   |   |   |   |   |   |   |   |   |       |   |   |   |        |   |   |   |        |   |   |   |        |   |   |   |        |   |   |   |        |   |   |   |        |   |   |   |      |

|                                  |       |         |       |         |  |
|----------------------------------|-------|---------|-------|---------|--|
| Acot4                            | -1.66 | 0.00050 | 2.02  | 0.00000 |  |
| Baat                             | -1.04 | 0.99999 | 4.06  | 0.00000 |  |
| Cpt2                             | 1.00  | 1.00000 | 1.75  | 0.00000 |  |
| Hadhb                            | -1.18 | 0.89958 | 3.66  | 0.00000 |  |
| Hadhsc                           | 1.04  | 0.99880 | 1.50  | 0.00000 |  |
| Mlycd                            | 1.03  | 0.99933 | 1.83  | 0.00000 |  |
| Nudt7                            | -1.30 | 0.70138 | 2.40  | 0.00010 |  |
| Nudt12                           | -1.04 | 0.99929 | 1.78  | 0.00000 |  |
| Peci                             | -1.13 | 0.80726 | 2.57  | 0.00000 |  |
| Pecr                             | 1.03  | 1.00000 | 2.89  | 0.00000 |  |
| Scp2                             | 1.26  | 0.01423 | -1.47 | 0.00003 |  |
| Pnpla8                           | -1.06 | 0.97725 | 1.47  | 0.00000 |  |
| <i>TCA cycle</i>                 |       |         |       |         |  |
| Pck1                             | -1.05 | 0.99994 | 1.64  | 0.00043 |  |
| Phdb                             | -1.02 | 1.00000 | 2.63  | 0.00000 |  |
| Aco1                             | 1.04  | 0.99993 | 2.72  | 0.00000 |  |
| Idh2                             | 1.28  | 0.49912 | 4.34  | 0.00000 |  |
| Dld                              | 1.09  | 0.99913 | 2.95  | 0.00000 |  |
| Sdhb                             | -1.13 | 0.22801 | 1.41  | 0.00001 |  |
| Sdhc                             | -1.12 | 0.92022 | 3.73  | 0.00000 |  |
| Fh1                              | -1.17 | 0.45301 | 2.92  | 0.00000 |  |
| Mdh1                             | -1.06 | 0.99835 | 2.35  | 0.00000 |  |
| Mdh2                             | 1.02  | 1.00000 | 2.19  | 0.00000 |  |
| Ogdh                             | -1.09 | 0.85601 | -1.41 | 0.00004 |  |
| <i>Oxidative phosphorylation</i> |       |         |       |         |  |
| Atp2a2                           | -1.33 | 0.04153 | 1.74  | 0.00002 |  |
| Atp2c1                           | 1.03  | 0.99917 | 1.65  | 0.00000 |  |
| Atp5a1                           | -1.01 | 1.00000 | 4.75  | 0.00000 |  |
| Atp5e                            | 1.03  | 0.99998 | 2.00  | 0.00000 |  |
| Atp5f1                           | 1.01  | 1.00000 | 1.75  | 0.00003 |  |
| Atp5h                            | -1.14 | 0.17032 | 1.9   | 0.00000 |  |
| Atp6v1a                          | 1.01  | 1.00000 | 2.51  | 0.00000 |  |
| Atp6v1c1                         | 1.05  | 0.99972 | 1.65  | 0.00001 |  |
| Atp11b                           | 1.00  | 1.00000 | 1.74  | 0.00000 |  |
| Atp13a1                          | -1.06 | 0.99694 | 1.91  | 0.00000 |  |
| Cox6c                            | -1.02 | 1.00000 | 2.80  | 0.00000 |  |
| Cox7a2                           | -1.18 | 0.50482 | 3.76  | 0.00000 |  |
| Cox7b                            | 1.16  | 0.53381 | 1.48  | 0.00036 |  |
| Cox11                            | -1.04 | 0.99988 | 1.92  | 0.00000 |  |
| Ndufa5                           | -1.00 | 1.00000 | 2.48  | 0.00000 |  |
| Ndufa12l                         | -1.01 | 1.00000 | 2.81  | 0.00000 |  |
| Ndufaf1                          | 1.09  | 0.72080 | 1.66  | 0.00000 |  |
| Ndufb2                           | -1.02 | 1.00000 | 2.67  | 0.00000 |  |
| Ndufb4                           | 1.12  | 0.87708 | 1.62  | 0.00004 |  |
| Ndufb5                           | -1.14 | 0.54419 | 3.02  | 0.00000 |  |
| Ndufb6                           | -1.53 | 0.00340 | 1.50  | 0.00554 |  |
| Ndufb9                           | -1.07 | 0.99825 | 3.86  | 0.00000 |  |

|         |       |         |      |         |
|---------|-------|---------|------|---------|
| Ndufb10 | -1.14 | 0.05687 | 2.57 | 0.00000 |
| Ndufs2  | -1.04 | 0.99994 | 1.73 | 0.00001 |
| Ndufs4  | -1.06 | 0.99981 | 3.83 | 0.00000 |
| Ppa2    | 1.06  | 0.99742 | 2.88 | 0.00000 |
| Sdhd    | -1.13 | 0.22801 | 1.41 | 0.00001 |
| Sdhb    | -1.12 | 0.92022 | 3.73 | 0.00000 |

Ffar3, free fatty acid receptor 3; Lpl, lipoprotein lipase; Stab2, stabilin 2; Pcsk9, proprotein convertase subtilisin/kexin type 9; Acaa2, acetyl-Coenzyme A acyltransferase 2 (mitochondrial 3-oxoacyl-Coenzyme A thiolase); Cidea, cell death-inducing DNA fragmentation factor, alpha subunit-like effector A; Decr2, peroxisomal 2,4-dienoyl-CoA reductase; Fads2, fatty acid desaturase 2; Acat3, acetyl-Coenzyme A acetyltransferase 3; Agpat, 1-acylglycerol-3-phosphate O-acyltransferase; Elovl, elongation of very long chain fatty acids (FEN1/Elo2, SUR4/Elo3, yeast)-like; Ppt1, palmitoyl-protein thioesterase 1; Abcd, ATP-binding cassette, sub-family D (ALD), member; Acadsb, acyl-Coenzyme A dehydrogenase, short/branched chain; Acot, acyl-CoA thioesterase; Baat, bile acid-Coenzyme A: amino acid N-acyltransferase; Cpt2, carnitine palmitoyltransferase 2; Hadhb, hydroxyacyl-Coenzyme A dehydrogenase/3-ketoacyl-Coenzyme A thiolase/enoyl-Coenzyme A hydratase (trifunctional protein), beta subunit; Mlycd, malonyl-CoA decarboxylase; Nudt, nudix (nucleoside diphosphate linked moiety X)-type motif; Peci, peroxisomal delta3, delta2-enoyl-Coenzyme A isomerase; Pcer, peroxisomal trans-2-enoyl-CoA reductase; Scp2, sterol carrier protein 2; Pnpla8, patatin-like phospholipase domain containing 8; Pck1, phosphoenolpyruvate carboxykinase 1, cytosolic; Phdb, pyruvate dehydrogenase (lipoamide) beta; Aco1, aconitase 1; Idh2, isocitrate dehydrogenase 2 (NADP+), mitochondrial; Dld, dihydrolipoamide dehydrogenase; Fh1, fumarate hydratase 1; Mdh, malate dehydrogenase; Ogdh, oxoglutarate dehydrogenase (lipoamide); Atp2a2, ATPase, Ca<sup>++</sup> transporting, cardiac muscle, slow twitch 2; Atp2c1, ATPase, Ca<sup>++</sup>-sequestering; Atp5a1, ATP synthase, H<sup>+</sup> transporting, mitochondrial F1 complex, alpha subunit, isoform 1; Atp5e, ATP synthase, H<sup>+</sup> transporting, mitochondrial F1 complex, epsilon subunit; Atp5f1, ATP synthase, H<sup>+</sup> transporting, mitochondrial F0 complex, subunit b, isoform 1; Atp5h, ATP synthase, H<sup>+</sup> transporting, mitochondrial F0 complex, subunit d; Atp6v1a, ATPase, H<sup>+</sup> transporting, lysosomal V1 subunit A; Atp6v1c1, ATPase, H<sup>+</sup> transporting, lysosomal V1 subunit C1; Atp11b, ATPase, class VI, type 11B; Atp13a1, ATPase type 13A1; Cox, cytochrome c oxidase, subunit Vic; Ndufa, NADH dehydrogenase (ubiquinone) 1 alpha; Ndufaf1, NADH dehydrogenase (ubiquinone) 1 alpha subcomplex, assembly factor 1; Ndufb, NADH dehydrogenase (ubiquinone) 1 beta; Ndufs, NADH dehydrogenase (ubiquinone) Fe-S protein; Ppa2, pyrophosphatase (inorganic) 2; Sdhd, succinate dehydrogenase complex, subunit D, iron sulfur (Ip); Sdhb, succinate dehydrogenase complex, subunit B, iron sulfur (Ip); Sdhb, succinate dehydrogenase complex, subunit D, integral membrane protein.

**Table S3.** Effect of ursolic acid on transcriptional pattern of TCA cycle-related genes in muscle of C57BL/6J mice.

| Gene             | Fold change (HFD/ND) | <i>p</i> value | Fold change (UR/HFD) | <i>p</i> value | Heatmap |
|------------------|----------------------|----------------|----------------------|----------------|---------|
| <i>TCA cycle</i> |                      |                |                      |                |         |
| Pdhd             | -1.34                | 0.02208        | 1.65                 | 0.00004        |         |
| Dld              | -1.32                | 0.01220        | 1.72                 | 0.00000        |         |
| Sdhb             | -1.46                | 0.01201        | 1.66                 | 0.00045        |         |
| Fh1              | -1.45                | 0.00180        | 1.64                 | 0.00004        |         |
| Atp5a1           | -1.25                | 0.18099        | 1.52                 | 0.00061        |         |

Phdb, pyruvate dehydrogenase (lipoamide) beta; Dld, dihydrolipoamide dehydrogenase; Sdhb, succinate dehydrogenase complex, subunit B, iron sulfur (Ip); Fh1, fumarate hydratase 1; Atp5a1, ATP synthase, H<sup>+</sup> transporting, mitochondrial F1 complex, alpha subunit, isoform 1.

**Table S4.** Effect of ursolic acid on transcriptional pattern of fibrosis-related genes in liver of C57BL/6J mice.

| Gene                                   | Fold change (HFD/ND) | p value | Fold change (UR/HFD) | p value | Heatmap                                                                                                                                                                                                                               |
|----------------------------------------|----------------------|---------|----------------------|---------|---------------------------------------------------------------------------------------------------------------------------------------------------------------------------------------------------------------------------------------|
| <b><i>Chemokines and Cytokines</i></b> |                      |         |                      |         |                                                                                                                                                                                                                                       |
| Ccl4                                   | 2.32                 | 0.00002 | -1.45                | 0.01239 | <p>HFD ND UR HFD</p> <p>Ccl4<br/>Ccr5<br/>Cxcl1<br/>Cxcl10<br/>Cxcl16<br/>Il5ra<br/>Tnfaip2<br/>Tnfrsf12a<br/>Tnfrsf17<br/>Adam11<br/>Adam23<br/>Adamts2<br/>Casp1<br/>Casp3<br/>Csf2ra<br/>Saa1<br/>Ccrn4l<br/>Il1rap<br/>Il10rb</p> |
| Ccr5                                   | 1.44                 | 0.00132 | -1.61                | 0.00004 |                                                                                                                                                                                                                                       |
| Cxcl1                                  | 4.49                 | 0.00000 | -2.06                | 0.00580 |                                                                                                                                                                                                                                       |
| Cxcl10                                 | 1.48                 | 0.03471 | -1.46                | 0.04346 |                                                                                                                                                                                                                                       |
| Cxcl16                                 | 1.47                 | 0.00481 | -1.70                | 0.00008 |                                                                                                                                                                                                                                       |
| Il5ra                                  | -1.05                | 0.99939 | -1.51                | 0.00004 |                                                                                                                                                                                                                                       |
| Tnfaip2                                | -1.00                | 1.00000 | -1.64                | 0.00001 |                                                                                                                                                                                                                                       |
| Tnfrsf12a                              | 1.21                 | 0.52211 | -1.65                | 0.00043 |                                                                                                                                                                                                                                       |
| Tnfrsf17                               | -1.09                | 0.88085 | -1.51                | 0.00001 |                                                                                                                                                                                                                                       |
| Adam11                                 | 2.87                 | 0.00000 | -1.88                | 0.00000 |                                                                                                                                                                                                                                       |
| Adam23                                 | -1.01                | 1.00000 | -1.61                | 0.00004 |                                                                                                                                                                                                                                       |
| Adamts2                                | 1.77                 | 0.00018 | -1.52                | 0.00674 |                                                                                                                                                                                                                                       |
| Casp1                                  | 1.35                 | 0.00126 | -1.61                | 0.00000 |                                                                                                                                                                                                                                       |
| Casp3                                  | 1.01                 | 1.00000 | -1.42                | 0.00000 |                                                                                                                                                                                                                                       |
| Csf2ra                                 | 1.38                 | 0.01484 | -1.42                | 0.00695 |                                                                                                                                                                                                                                       |
| Saa1                                   | 5.09                 | 0.00000 | -1.97                | 0.00512 |                                                                                                                                                                                                                                       |
| Ccrn4l                                 | 1.27                 | 0.77589 | 3.80                 | 0.00000 |                                                                                                                                                                                                                                       |
| Il1rap                                 | -1.18                | 0.73727 | 3.43                 | 0.00000 |                                                                                                                                                                                                                                       |
| Il10rb                                 | 1.08                 | 0.98360 | 1.52                 | 0.00006 |                                                                                                                                                                                                                                       |
| <b><i>ECM remodeling</i></b>           |                      |         |                      |         |                                                                                                                                                                                                                                       |
| Tlr7                                   | 1.38                 | 0.00001 | -1.44                | 0.00000 | <p>HFD ND UR HFD</p> <p>Tlr7<br/>Lum<br/>Mmp1a<br/>Mmp13<br/>Mmp14<br/>Cd14<br/>Cd44<br/>Cd52<br/>Cd63<br/>Cd68<br/>Cd72<br/>Cd74<br/>Cd84<br/>Cd93<br/>Cd97<br/>Cd207<br/>Cd163</p>                                                  |
| Lum                                    | 1.41                 | 0.43759 | -1.45                | 0.00475 |                                                                                                                                                                                                                                       |
| Mmp1a                                  | -1.04                | 0.99931 | -1.59                | 0.00000 |                                                                                                                                                                                                                                       |
| Mmp13                                  | 3.34                 | 0.00000 | -1.89                | 0.00572 |                                                                                                                                                                                                                                       |
| Mmp14                                  | -1.26                | 0.19853 | -1.48                | 0.00288 |                                                                                                                                                                                                                                       |
| Cd14                                   | 1.26                 | 0.41587 | -1.43                | 0.04289 |                                                                                                                                                                                                                                       |
| Cd44                                   | 1.55                 | 0.00061 | -1.84                | 0.00000 |                                                                                                                                                                                                                                       |
| Cd52                                   | 1.78                 | 0.00015 | -1.72                | 0.00036 |                                                                                                                                                                                                                                       |
| Cd63                                   | 2.03                 | 0.00646 | -1.82                | 0.02941 |                                                                                                                                                                                                                                       |
| Cd68                                   | 1.62                 | 0.00095 | -1.91                | 0.00002 |                                                                                                                                                                                                                                       |
| Cd72                                   | 1.74                 | 0.00001 | -1.47                | 0.00145 |                                                                                                                                                                                                                                       |
| Cd74                                   | 1.86                 | 0.00027 | -1.95                | 0.00010 |                                                                                                                                                                                                                                       |
| Cd84                                   | 1.33                 | 0.00656 | -1.72                | 0.00000 |                                                                                                                                                                                                                                       |
| Cd93                                   | 1.35                 | 0.00036 | -1.44                | 0.00003 |                                                                                                                                                                                                                                       |
| Cd97                                   | 1.22                 | 0.00622 | -1.59                | 0.00000 |                                                                                                                                                                                                                                       |
| Cd207                                  | 1.64                 | 0.00825 | -1.95                | 0.00024 |                                                                                                                                                                                                                                       |
| Cd163                                  | -1.29                | 0.06830 | 1.58                 | 0.00011 |                                                                                                                                                                                                                                       |
| <b><i>ECM regulation</i></b>           |                      |         |                      |         |                                                                                                                                                                                                                                       |

|         |      |         |       |         |  |
|---------|------|---------|-------|---------|--|
| Col1a1  | 2.74 | 0.00001 | -1.78 | 0.01204 |  |
| Col4a1  | 1.66 | 0.00001 | -1.68 | 0.00001 |  |
| Col4a2  | 1.70 | 0.00016 | -1.52 | 0.00350 |  |
| Col6a1  | 1.79 | 0.00032 | -1.48 | 0.02468 |  |
| Col14a1 | 1.62 | 0.00028 | -1.44 | 0.00641 |  |

Col4, chemokine (C-C motif) ligand 4; Ccr5, chemokine (C-C motif) receptor 5; Cxcl, chemokine (C-X-C motif) ligand; Il5ra, interleukin 5 receptor, alpha; Tnfaip2, tumor necrosis factor, alpha-induced protein 2; Tnfrsf, tumor necrosis factor (ligand) superfamily; Adam, a disintegrin and metallopeptidase; Adamts2, a disintegrin-like and metallopeptidase (reprolysin type) with thrombospondin type 1 motif, 2; Casp, caspase; Csf2ra, colony stimulating factor 2 receptor, alpha, low-affinity (granulocyte-macrophage); Saa1, serum amyloid A-1 protein precursor; Ccrn4l, CCR4 carbon catabolite repression 4-like (S. cerevisiae); Il1rap, interleukin 1 receptor accessory protein; Il10rb, interleukin 10 receptor, beta; Tlr7, toll-like receptor 7; Lum, lumican; Mmp, matrix metallopeptidase; Cd, CD antigen; Col1a1, collagen, type I, alpha 1 e; Col4a1, procollagen, type IV, alpha 1; Col4a2, collagen, type IV, alpha 2; Col6a1, procollagen, type VI, alpha 1; Col14a1, collagen, type XIV, alpha 1.

**Table S5.** Effect of ursolic acid on transcriptional pattern of fibrosis-related genes in muscle of C57BL/6J mice.

| Gene                            | Fold change (HFD/ND) | p value | Fold change (UR/HFD) | p value | Heatmap |
|---------------------------------|----------------------|---------|----------------------|---------|---------|
| <b>Chemokines and Cytokines</b> |                      |         |                      |         |         |
| Adam9                           | -1.37                | 0.00191 | 1.60                 | 0.00001 |         |
| Cxcl4                           | -1.10                | 0.59853 | 1.45                 | 0.00000 |         |
| Il15                            | -1.25                | 0.03274 | 1.54                 | 0.00001 |         |
| Itgbl1                          | -1.32                | 0.14787 | 1.42                 | 0.02815 |         |
| Itgb1bp3                        | 1.16                 | 0.96132 | 1.53                 | 0.03059 |         |
| <b>ECM remodeling</b>           |                      |         |                      |         |         |
| Dcn                             | -1.51                | 0.00032 | 1.65                 | 0.00002 |         |
| Sparc                           | -1.19                | 0.15915 | 1.97                 | 0.00000 |         |
| Sparcl1                         | -1.06                | 0.99799 | 1.49                 | 0.00021 |         |
| <b>ECM regulation</b>           |                      |         |                      |         |         |
| Col1a1                          | 1.02                 | 1.00000 | 1.65                 | 0.04373 |         |
| Col3a1                          | -1.14                | 0.98834 | 1.62                 | 0.02670 |         |
| Col5a1                          | 1.04                 | 1.00000 | 1.51                 | 0.01177 |         |
| Col6a1                          | -1.06                | 0.99814 | 1.45                 | 0.00076 |         |
| Col6a3                          | 1.09                 | 0.99586 | 1.50                 | 0.01083 |         |
| Col8a1                          | -1.08                | 0.99757 | 1.50                 | 0.00644 |         |
| Col16a1                         | -1.09                | 0.98589 | 1.42                 | 0.00895 |         |

Adam9, a disintegrin and metallopeptidase domain 9; Cxcl4, chemokine (C-X-C motif) ligand 4; Il15, interleukin 15; Itgbl1, integrin, beta-like 1; Itgb1bp3, integrin beta 1 binding protein 3; Dcn, decorin; Sparc, secreted acidic cysteine rich glycoprotein; Sparcl1, SPARC-like 1 (mast9, hevin); Col1a1, collagen, type I, alpha 1 e; Col3a1, collagen, type III, alpha 1; Col5a1, procollagen, type V, alpha 1; Col6a, procollagen, type VI, alpha; Col8a1, collagen, type VIII, alpha 1; Col16a1, collagen, type XVI, alpha 1. .
